# Supplementary material for: 5-FU promotes stemness of colorectal cancer via p53-mediated WNT/β-catenin pathway activation
Source: PubMed Central journal article supplement (PMC7578039; doi:10.1038/s41467-020-19173-2), 2020-10-21
Supplement: 41467_2020_19173_MOESM3_ESM.pdf [file 41467_2020_19173_MOESM3_ESM.pdf]

## **Description of Additional Supplementary Files**

File Name: Supplementary Movie 1

Description: Lgr5 (GFP) expression in murine CRC tumor organoid. Video showing the expression of Lgr5 (GFP)+ CSCs in un-treated control group for 48 h.

File Name: Supplementary Movie 2

Description: Lgr5 (GFP) enrichment by 5-FU in murine CRC tumor organoid. Video showing the activation and enrichment of Lgr5 (GFP)+ CSCs during 48 h treatment of 5-FU.
